# Supplementary material
Source: Springer Nature journal article supplement (https://www.springermedizin.de/resource/supplementary/13054_2011_9554_MOESM4_ESM.pdf/9706462)

# Product-Limit Survival Estimates

With Number of Subjects at Risk

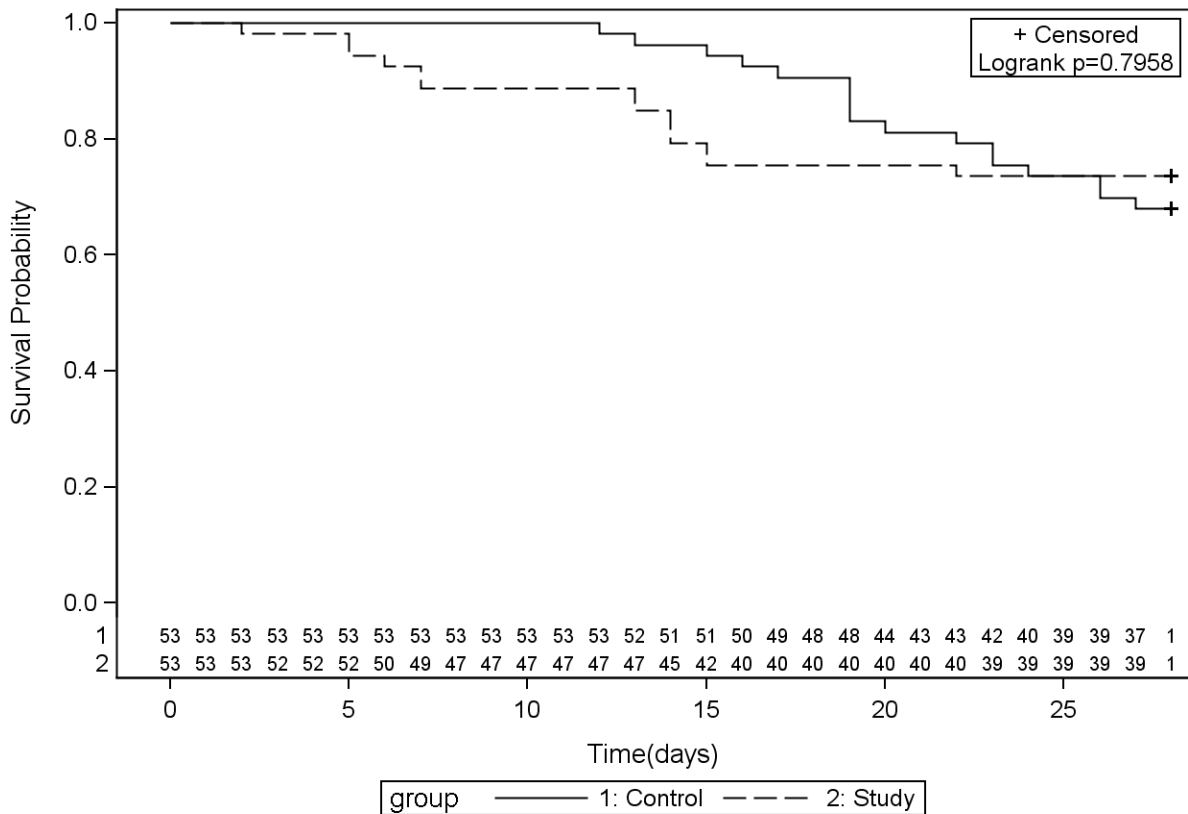

Supplement: MOESM4 [file 9706462]
